# Supplementary material for: Metabolic Composition and Quality Traits of Polygonatum cyrtonema Hua from Different Germplasms and Age Sections Based on Widely Targeted Metabolomics Analysis
Source: MDPI journal article supplement (doi:10.3390/ijms24076077), 2023-03-23
Supplement: s1 [file s1]

## Supplementary material

**Table S1.** qRT-PCR primers in this study.

| Gene name |         | Primer Sequences (5' -3' ) | Annealing        | GC%  |
|-----------|---------|----------------------------|------------------|------|
|           |         |                            | temperature (°C) |      |
| DGAT1     | Forward | AAAGGTTGGGTAATACGCC        | 56.6             | 47.4 |
|           | Reverse | GCCAGACATACAAAGTGGG        | 56.5             | 52.6 |
| DGAT2.4   | Forward | AGAACAGACTGGGCAGGAAA       | 59.8             | 50   |
|           | Reverse | AGGACCTTGATCTTCGGCA        | 60.8             | 52.6 |
| GPAT9.1   | Forward | AAGTATCATGGACCTCGCCC       | 61.2             | 55   |
|           | Reverse | TGGCCACAATTTACGATC         | 60.5             | 47.4 |
| GPAT9.3   | Forward | ATCGCCTACACTAACTGAAGC      | 56.3             | 47.6 |
|           | Reverse | AAACACAATCCACCCAGC         | 56.8             | 50   |
| LPAT1.1   | Forward | TGGTTGCTAAGGTTTGGG         | 57.1             | 50   |
|           | Reverse | ATGCCCCGTCTTGCTAATG        | 57.2             | 50   |
| LPAT2.9   | Forward | GCCTCCTGTTTCTTCTTTTCG      | 59.1             | 50   |
|           | Reverse | AGACCTGCCCACCAATCTAC       | 59               | 55   |
| LPAT4.3   | Forward | ACGAAGACACCAGCCATTG        | 59.7             | 52.6 |
|           | Reverse | GCCACATAGATAGCCAAGTCC      | 58.7             | 52.4 |
| UBQ-E2-10 | Forward | GGACCCAGAAGTACGCAATG       | 60.5             | 55   |
|           | Reverse | AATTACCAGGGATACAGCACC      | 57.9             | 47.6 |

**Table S2.** Key differential metabolites in three germplasms (JL, JZ, and GK).

| Compounds                | Class     | Relative ionic strength |          |          |
|--------------------------|-----------|-------------------------|----------|----------|
|                          |           | JL                      | JZ       | GK       |
| 3-amino-2-naphthoic acid | Alkaloids | 1.38E+07                | 4.30E+06 | 1.69E+06 |
| 3-Indoleacrylic acid*    | Alkaloids | 1.48E+07                | 4.94E+06 | 1.82E+06 |
| Methoxyindoleacetic acid | Alkaloids | 2.08E+05                | 6.46E+04 | 2.72E+04 |
| N-Cis-Feruloyltyramine   | Alkaloids | 6.57E+04                | 2.66E+05 | 8.94E+05 |

|                                                                                    |                             |          |          |          |
|------------------------------------------------------------------------------------|-----------------------------|----------|----------|----------|
| p-Coumaroyltyramine*                                                               | Alkaloids                   | 1.59E+04 | 1.61E+05 | 7.64E+05 |
| Tataramide A                                                                       | Alkaloids                   | 5.95E+03 | 1.96E+04 | 8.87E+04 |
| N-trans-p-Coumaroyloctopamine*                                                     | Alkaloids                   | 1.06E+04 | 4.50E+04 | 3.76E+05 |
| N-Trans-Feruloylphenacylamine                                                      | Alkaloids                   | 3.50E+04 | 1.48E+05 | 3.95E+05 |
| N-trans-p-Coumaroylphenacylamine                                                   | Alkaloids                   | 1.27E+04 | 7.18E+04 | 6.00E+05 |
| N-Trans-Feruloyloctopamine*                                                        | Alkaloids                   | 6.03E+04 | 1.75E+05 | 5.08E+05 |
| N-Feruloyloctopamine                                                               | Alkaloids                   | 1.06E+04 | 2.81E+04 | 1.09E+05 |
| N-Feruloyl-3-methoxytyramine*                                                      | Alkaloids                   | 4.94E+02 | 1.01E+04 | 1.19E+05 |
| N-Trans-Feruloyl-3'-O-methyldopamine*                                              | Alkaloids                   | 1.60E+03 | 8.75E+03 | 1.11E+05 |
| N-Cis-Feruloyl-3'-O-methyldopamine*                                                | Alkaloids                   | 2.48E+03 | 9.02E+03 | 1.04E+05 |
| (2E)-3-(4-Hydroxyphenyl)-N-[2-(4-hydroxyphenyl)ethyl]-2-propenamide*               | Alkaloids                   | 1.38E+04 | 1.50E+05 | 8.12E+05 |
| (2Z)-N-[2-(3,4-Dihydroxyphenyl)-2-hydroxyethyl]-3-(4-methoxyphenyl)-2-propenamide* | Alkaloids                   | 6.48E+04 | 1.78E+05 | 5.25E+05 |
| Luteolin-7-O-glucoside (Cynaroside)*                                               | Flavonoids                  | 2.07E+05 | 1.59E+04 | 3.87E+04 |
| 6-C-Methylquercetin-3-O-glucoside*                                                 | Flavonoids                  | 4.40E+05 | 4.74E+04 | 1.93E+04 |
| 3'-O-Methyltricetin-7-O-glucoside*                                                 | Flavonoids                  | 4.07E+05 | 3.49E+04 | 1.64E+04 |
| Gossypetin-3-O-glucoside                                                           | Flavonoids                  | 1.18E+05 | 1.89E+04 | 9.00E+00 |
| 2,6-Dimethoxybenzaldehyde                                                          | Phenolic acids              | 3.62E+04 | 1.30E+04 | 4.71E+03 |
| P-Hydroxycinnamic acid p-hydroxyphenethylamine*                                    | Phenolic acids              | 2.41E+04 | 1.63E+05 | 8.39E+05 |
| Salicylic acid-2-O-glucoside*                                                      | Phenolic acids              | 1.22E+05 | 9.04E+05 | 3.89E+05 |
| 6-O-Acetylارbutin                                                                  | Phenolic acids              | 1.02E+04 | 9.00E+00 | 4.34E+03 |
| Methoxysalicylic acid glucoside*                                                   | Phenolic acids              | 2.16E+05 | 1.96E+06 | 6.78E+05 |
| 5-Glucosyloxy-2-Hydroxybenzoic acid methyl ester*                                  | Phenolic acids              | 1.43E+05 | 2.99E+05 | 2.54E+04 |
| 3,4,5-Trimethoxyphenyl-1-O-Glucoside                                               | Phenolic acids              | 4.54E+05 | 4.04E+06 | 1.37E+06 |
| Benzyl β-primeveroside*                                                            | Phenolic acids              | 1.23E+05 | 2.66E+05 | 5.13E+04 |
| DL-Tryptophan                                                                      | Amino acids and derivatives | 2.94E+07 | 1.32E+07 | 5.38E+06 |
| Seryl threonine                                                                    | Amino acids and derivatives | 1.41E+05 | 4.50E+04 | 1.86E+04 |
| Threonylleucine                                                                    | Amino acids and derivatives | 1.72E+07 | 4.15E+06 | 1.24E+06 |
| L-Valyl-L-Phenylalanine                                                            | Amino acids and derivatives | 6.24E+03 | 2.57E+04 | 5.26E+04 |
| (10E,12Z)-9-Oxo-octadeca-10,12-dienoic acid                                        | Lipids                      | 1.13E+03 | 2.56E+03 | 1.22E+04 |
| E,E,Z-1,3,12-Nonadecatriene-5,14-diol                                              | Lipids                      | 4.99E+02 | 1.22E+03 | 2.04E+04 |
| Eicosadienoic acid                                                                 | Lipids                      | 1.79E+04 | 4.35E+04 | 3.64E+05 |
| 2-α-Linolenoyl-glycerol                                                            | Lipids                      | 1.44E+04 | 6.47E+03 | 9.31E+05 |
| MG 18:3                                                                            | Lipids                      | 1.36E+04 | 6.17E+03 | 9.42E+05 |
| naphthisoxazol A*                                                                  | Others                      | 1.34E+07 | 4.38E+06 | 1.66E+06 |
| Tridecadienoyl sulfate                                                             | Others                      | 1.34E+04 | 2.96E+04 | 2.77E+03 |
| Ruscogenin-1-O-carboxyglucosyl(1,2)ramnoside                                       | Steroids                    | 2.69E+05 | 9.46E+04 | 1.87E+04 |
| Muconic acid                                                                       | Organic acids               | 3.82E+05 | 1.55E+05 | 5.21E+04 |

Note: JL: pointed-leaved green stem, JZ: pointed-leaved purple stem, GK: broad-leaved green stem. "\*" indicates an isomer, and the same below.

**Table S3.** Key differential metabolites in three age sections (AT, BT, and CT).

| Compounds                                              | Class                       | Relative ionic strength |          |          |
|--------------------------------------------------------|-----------------------------|-------------------------|----------|----------|
|                                                        |                             | AT                      | BT       | CT       |
| LysoPC 20:2*                                           | Lipids                      | 2.42E+05                | 1.17E+05 | 5.14E+04 |
| 4-Methoxybutyl Acetate                                 | Lipids                      | 7.92E+04                | 3.81E+04 | 1.69E+04 |
| LysoPC 20:2(2n isomer)*                                | Lipids                      | 9.93E+04                | 4.89E+04 | 1.88E+04 |
| N-Feruloyltryptamine                                   | Alkaloids                   | 3.19E+04                | 1.01E+04 | 9.00E+00 |
| N-(4-hydroxyphenethyl)-glucosamine                     | Alkaloids                   | 3.17E+05                | 6.98E+05 | 2.71E+06 |
| Sibiricose A6                                          | Phenolic acids              | 7.39E+03                | 9.00E+00 | 3.68E+04 |
| 3-Hydroxy-5-Methylphenol-1-O-Glucoside                 | Phenolic acids              | 1.71E+06                | 5.33E+05 | 1.75E+05 |
| Furanofructosyl- $\alpha$ -D-(3-mustard acyl)glucoside | Phenolic acids              | 4.69E+03                | 1.57E+04 | 5.79E+04 |
| L-Serine                                               | Amino acids and derivatives | 1.28E+06                | 3.41E+06 | 6.88E+06 |
| L-Alanyl-L-Alanine                                     | Amino acids and derivatives | 5.66E+04                | 1.25E+04 | 2.74E+04 |
| 3-Aminoisobutyric acid*                                | Organic acids               | 2.95E+04                | 1.34E+04 | 3.92E+03 |
| 1-Pyrroline-4-hydroxy-2-carboxylic acid                | Organic acids               | 1.79E+05                | 9.00E+00 | 4.13E+05 |
| Phloretin                                              | Flavonoids                  | 4.65E+04                | 3.06E+05 | 9.65E+05 |
| Diosgenin                                              | Steroids                    | 1.13E+05                | 1.03E+04 | 9.00E+00 |
| Trehalose 6-phosphate                                  | Saccharides and Alcohols    | 3.94E+05                | 2.59E+06 | 1.05E+06 |
| Tridecadienoyl sulfate                                 | Others                      | 3.25E+05                | 1.32E+06 | 3.09E+06 |

Note: AT: one-year age sections, BT: two-year age sections, CT: three-year age sections.

**Table S4.** Relative expression of *GPAT*, *LPAT*, and *DGAT* genes in the transcriptome of different tissue sites of *P. cyrtonema*.

| Index                | Gene name | Class | F     | L     | R     | S     | T     |
|----------------------|-----------|-------|-------|-------|-------|-------|-------|
| Cluster-11683.26510  | PcGPAT1.2 | GPAT  | 0.00  | 0.00  | 0.00  | 0.00  | 1.06  |
| Cluster-11683.201308 | PcGPAT1.3 |       | 1.29  | 0.13  | 28.28 | 0.00  | 0.45  |
| Cluster-11683.106825 | PcGPAT9.2 |       | 4.54  | 8.03  | 6.21  | 6.02  | 3.56  |
| Cluster-11683.56323  | PcGPAT6.1 |       | 0.99  | 0.00  | 2.35  | 0.04  | 0.53  |
| Cluster-29692.0      | PcGPAT1.5 |       | 1.04  | 0.00  | 1.15  | 0.00  | 1.33  |
| Cluster-11683.178507 | PcGPAT9.5 |       | 1.20  | 1.93  | 0.91  | 0.97  | 1.77  |
| Cluster-11683.137258 | PcGPAT4   |       | 83.60 | 3.58  | 27.64 | 2.96  | 7.26  |
| Cluster-11683.117604 | PcGPAT9.3 |       | 17.84 | 11.21 | 20.53 | 15.70 | 12.04 |
| Cluster-11683.145205 | PcGPAT3.2 |       | 0.20  | 0.09  | 1.00  | 0.00  | 0.00  |
| Cluster-11683.226019 | PcGPAT1.4 |       | 0.00  | 0.00  | 1.39  | 0.00  | 0.02  |
| Cluster-11683.131185 | PcGPAT9.4 |       | 3.82  | 4.21  | 3.26  | 6.01  | 1.67  |
| Cluster-11683.76883  | PcGPAT6.3 |       | 2.04  | 4.21  | 0.98  | 0.82  | 1.03  |
| Cluster-11683.61945  | PcGPAT6.2 |       | 0.22  | 2.57  | 1.46  | 1.45  | 2.14  |

|                      |           |      |        |        |        |        |        |
|----------------------|-----------|------|--------|--------|--------|--------|--------|
| Cluster-11683.17927  | PcGPAT1.1 |      | 0.17   | 0.02   | 4.67   | 0.00   | 0.00   |
| Cluster-11683.60675  | PcGPAT5   |      | 6.20   | 0.17   | 3.55   | 0.00   | 0.80   |
| Cluster-11683.49377  | PcGPAT3.1 |      | 1.39   | 0.07   | 3.37   | 0.37   | 0.01   |
| Cluster-11683.89039  | PcGPAT9.1 |      | 18.68  | 31.84  | 26.60  | 32.77  | 22.48  |
| Cluster-11683.125365 | PcATS1.1  |      | 27.30  | 60.12  | 6.92   | 50.41  | 10.00  |
| Cluster-11683.168120 | PcATS1.2  |      | 0.24   | 0.77   | 0.39   | 0.65   | 0.95   |
| Cluster-11683.164452 | PcLPAT2.7 |      | 2.04   | 2.42   | 2.24   | 2.16   | 1.82   |
| Cluster-11683.140043 | PcLPAT2.4 |      | 23.98  | 17.90  | 16.66  | 17.50  | 17.38  |
| Cluster-11683.122314 | PcLPAT2.3 |      | 14.78  | 13.09  | 12.89  | 16.48  | 16.93  |
| Cluster-11683.86126  | PcLPAT2.1 |      | 0.61   | 1.09   | 0.81   | 1.02   | 0.44   |
| Cluster-11683.105098 | PcLPAT2.2 |      | 39.50  | 17.02  | 13.34  | 20.85  | 23.36  |
| Cluster-11683.145946 | PcLPAT1.2 |      | 67.18  | 77.56  | 2.65   | 33.24  | 4.43   |
| Cluster-11683.143957 | PcLPAT2.5 | LPAT | 1.02   | 0.55   | 0.07   | 1.13   | 0.46   |
| Cluster-11683.187439 | PcLPAT2.9 |      | 15.24  | 14.57  | 14.63  | 12.41  | 24.34  |
| Cluster-11683.63640  | PcLPAT4.1 |      | 8.72   | 22.37  | 14.10  | 26.12  | 11.41  |
| Cluster-11683.116975 | PcLPAT1.1 |      | 6.14   | 9.96   | 7.41   | 9.10   | 12.05  |
| Cluster-11683.144893 | PcLPAT4.3 |      | 12.81  | 7.21   | 11.27  | 9.63   | 13.23  |
| Cluster-11683.169863 | PcLPAT2.8 |      | 2.13   | 2.33   | 1.16   | 2.12   | 0.30   |
| Cluster-11683.95330  | PcLPAT4.2 |      | 0.20   | 0.73   | 0.00   | 0.20   | 0.10   |
| Cluster-11683.158348 | PcLPAT2.6 |      |        |        |        |        |        |
| Cluster-11683.114805 | PcDGAT1   |      | 11.30  | 13.73  | 16.87  | 17.36  | 14.61  |
| Cluster-11683.125465 | PcDGAT2.2 |      | 8.36   | 11.50  | 6.17   | 9.70   | 6.47   |
| Cluster-11683.128175 | PcDGAT2.3 |      | 19.39  | 12.13  | 0.00   | 58.36  | 0.05   |
| Cluster-11683.137374 | PcDGAT2.4 |      | 242.85 | 295.00 | 112.25 | 352.44 | 160.04 |
| Cluster-11683.139297 | PcDGAT2.5 |      | 0.21   | 0.47   | 0.64   | 0.29   | 0.03   |
| Cluster-11683.144767 | PcDGAT2.6 |      | 1.24   | 0.81   | 0.16   | 0.97   | 0.57   |
| Cluster-11683.150005 | PcWSD1.3  | DGAT | 23.53  | 91.68  | 32.73  | 38.69  | 10.95  |
| Cluster-11683.160378 | PcWSD1.4  |      | 0.89   | 3.21   | 0.40   | 2.93   | 0.29   |
| Cluster-11683.202350 | PcWSD1.5  |      | 1.90   | 0.06   | 0.35   | 0.02   | 0.33   |
| Cluster-11683.61124  | PcWSD1.1  |      | 1.95   | 0.62   | 0.57   | 0.12   | 5.80   |
| Cluster-11683.64305  | PcWSD1.2  |      | 1.60   | 0.09   | 0.20   | 0.00   | 0.84   |
| Cluster-11683.123837 | PcDGAT2.1 |      |        |        |        |        |        |
| Cluster-11683.175971 | PcDGAT2.7 |      |        |        |        |        |        |

Note: F: fruit, L: leaf, R: root, S: stem, T: rhizome.

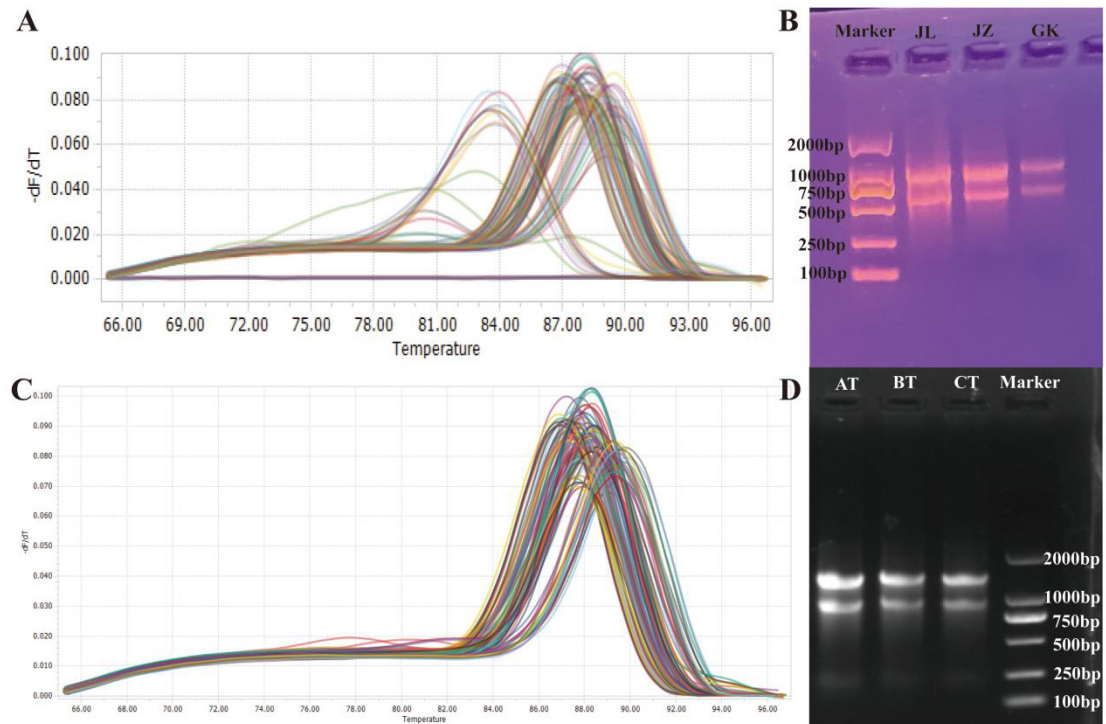

**Figure S1.** Melting curve (A: different germplasms, C: different age sections) of qRT-PCR and electrophoresis map (B: different germplasms, D: different age sections) of the total RNA isolated from *P. cyrtonema*.

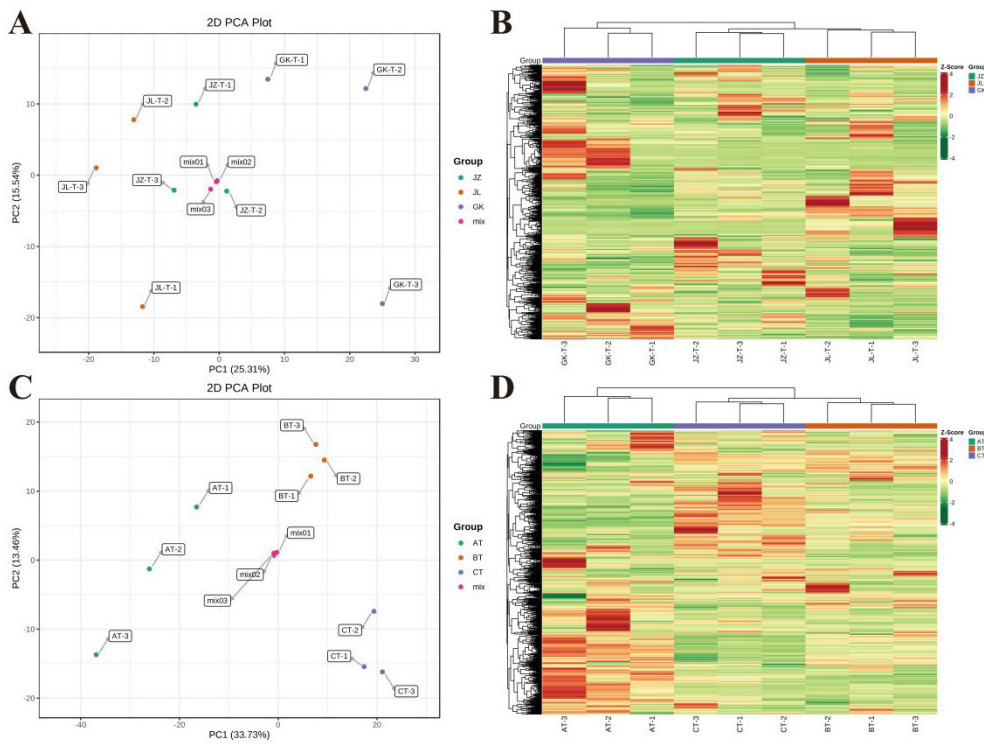

**Figure S2.** PCA plots (A: different germplasms, C: different age sections) and clustered heat maps (B: different germplasms, D: different age sections) of *P. cyrtonema*.

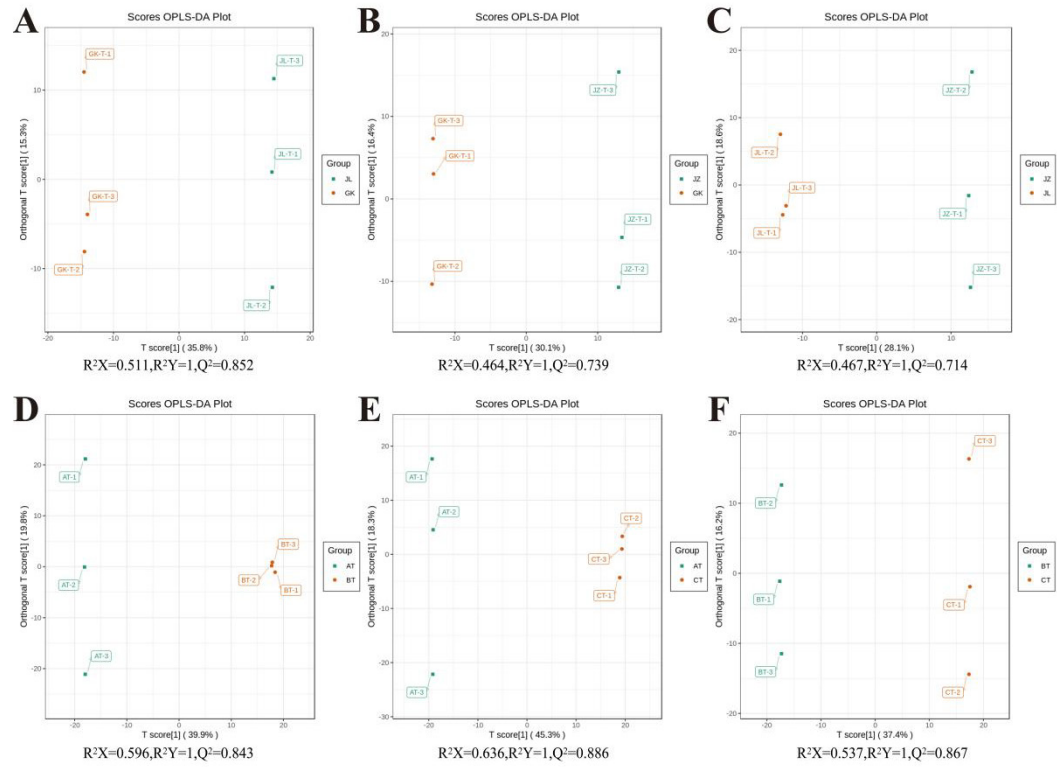

**Figure S3.** OPLS-DA score plot for *P. cyrtonema* (A: JL vs GK, B: JZ vs GK, C: JZ vs JL, D: AT vs BT, E: AT vs CT, F: BT vs CT).
